# Supplementary material for: Sex Differences in Dietary Patterns of Adults and Their Associations with the Double Burden of Malnutrition: A Population-Based National Survey in the Philippines
Source: MDPI journal article supplement (doi:10.3390/nu14173495), 2022-08-25
Supplement: s1 [file s1]

## Supplementary Files

**Table S1.** Food groups used in the dietary pattern analysis <sup>1</sup>.

| <b>Food groups</b>                | <b>Food items included</b>                                                                                                                                                |
|-----------------------------------|---------------------------------------------------------------------------------------------------------------------------------------------------------------------------|
| Rice and rice products            | Rice, other rice products such as rice noodles, rice cakes                                                                                                                |
| Corn and corn products            | Milled corn, corn on a cob, other corn products such as cornstarch, corn pudding, popcorn, corn chips                                                                     |
| Other cereal products             | <i>Pandesal</i> , bread, cookies/biscuits, cakes/pastries, noodles, flour, and others                                                                                     |
| Starchy roots and tubers          | Sweet potatoes and products, potatoes and products, cassava and products, and other roots and tubers such as yam, taro, and arrowroot                                     |
| Sugar and syrups                  | Sugars, jams, candies, honey, sweetened soda, sherbet, ice drop, ice candy, sugary foods such as chocolates, and others                                                   |
| Dried beans, nuts, and seeds      | Mungbean and products, soybeans and products, nuts and products, and other dried beans/seeds and products such as almond, peas, sesame seed, green peas, tofu, and others |
| Green leafy and yellow vegetables | Green leafy vegetables, squash fruit, carrot, and other yellow vegetables                                                                                                 |
| Other vegetables                  | Eggplant, string beans, bitter melon, other wild vegetables, and other canned/processed vegetables                                                                        |
| Fruits                            | Mango, citrus fruits, strawberry, guava, banana, watermelon, melon, jackfruit, pineapple, young coconut, and others                                                       |
| Fish and fish products            | Fresh fish, dried fish, processed fish, crustaceans, and mollusks                                                                                                         |
| Meat and meat products            | Fresh meat, organ meat, and processed meat                                                                                                                                |
| Poultry                           | Chicken, other fowls such as duck, goose, pigeon, turkey                                                                                                                  |
| Eggs                              | Hen's egg, duck's egg, other eggs such as quail egg, turkey egg                                                                                                           |
| Milk and milk products            | Fresh whole milk, evaporated milk, recombined milk, powdered milk, and condensed milk, cheese, other milk products such as ice cream, yogurt, cultured milk               |
| Fats and oils                     | Cooking oil, coconut meat, coconut cream, pork drippings and lard, butter, margarine, peanut butter, and others                                                           |
| Beverages                         | Coffee, tea, alcoholic beverages, chocolate-based beverages, fruit-flavored drink, and others                                                                             |
| Condiments and spices             | Salt, vinegar, catsup, and other seasonings                                                                                                                               |
| Other miscellaneous food          | Lemongrass, bay leaves, oregano, turmeric, food coloring, and others                                                                                                      |

<sup>1</sup>The food groups and food items were pre-identified in the 2013 Philippine National Nutrition Survey.

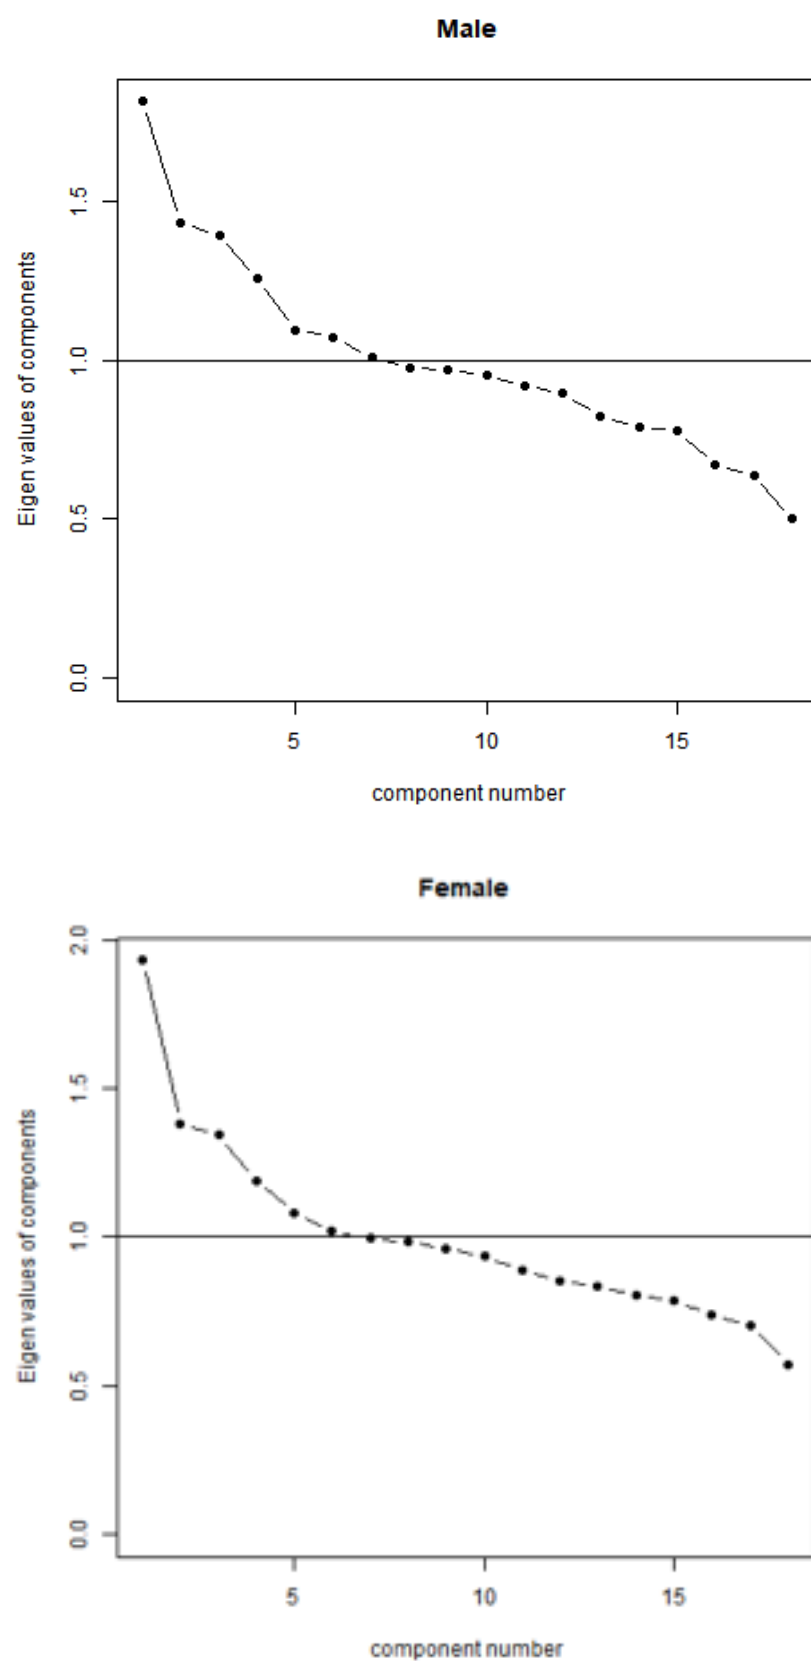

**Figure S1.** Scree plots showing the eigenvalues of components extracted using factor analysis by sex.
